# Supplementary material for: Modelling rock glacier velocity and ice content, Khumbu and Lhotse Valleys, Nepal
Source: Copernicus journal article supplement (doi:10.5194/tc-2021-110), 2021-07-14
Supplement: Supplementary file 1 [file tc-2021-110-supplement.pdf]

# Supplements for Modelling rock glacier velocity and ice content, Khumbu and Lhotse Valleys, Nepal

Yan Hu<sup>1,2</sup>, Stephan Harrison<sup>2</sup>, Lin Liu<sup>1</sup>, Joanne Laura Wood<sup>2</sup>

5 <sup>1</sup>Earth System Science Programme, Faculty of Science, The Chinese University of Hong Kong, Hong Kong SAR, China  
<sup>2</sup>College of Life and Environmental Sciences, University of Exeter, Penryn, Cornwall, TR10 9EZ, UK

*Correspondence to:* Yan Hu (huyan@link.cuhk.edu.hk)

## Contents of this file

Figures S1 and S2

10 The debris-covered glaciers (DCGs) investigated in this study show a discontinuous and inconsistent velocity field due to its heterogeneous and fast motion which is unfavorable for InSAR measurements (Fig. S1). Figure S2 presents that the DCGs exhibit similar and stable kinematic features in mean and median velocities as rock glaciers, yet Chola DCG shows a standard deviation in mean velocity as  $15.4 \text{ cm yr}^{-1}$ , much higher than that of the rock glaciers ( $3.4 \text{ cm yr}^{-1}$ ). The maximum velocity is variable with the largest value of  $215.9 \pm 29.7 \text{ cm yr}^{-1}$ , as shown in Chola DCG (Fig. S2b). However, those statistics of velocity  
15 distribution of debris-covered glaciers based on InSAR cannot characterize the heterogeneous kinematic behaviors of the entire landform because of the spatially incomplete record, as illustrated in Fig. S1.

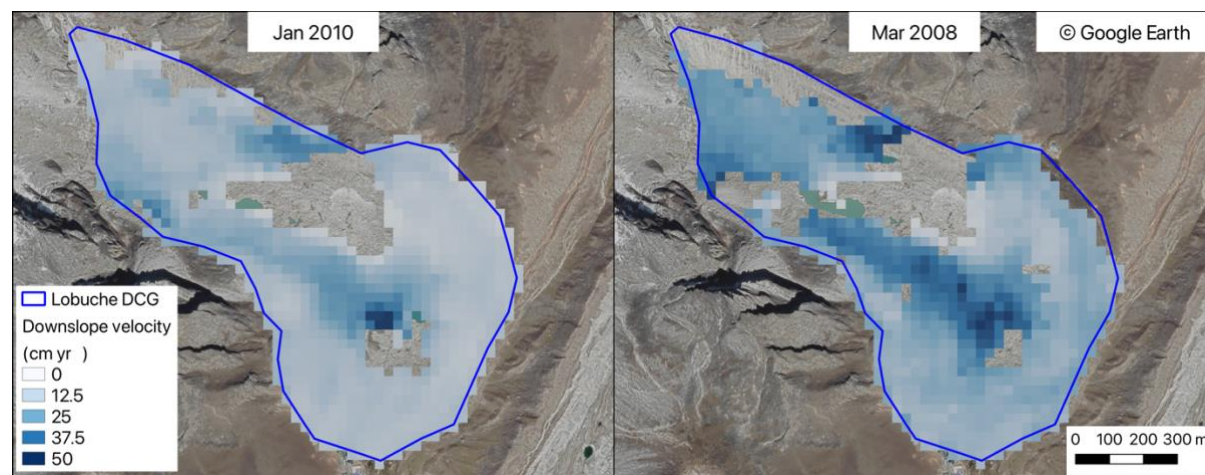

**Figure S1: Velocity field map showing the discontinuous and inconsistent surface velocity distribution of Lobuche DCG.**

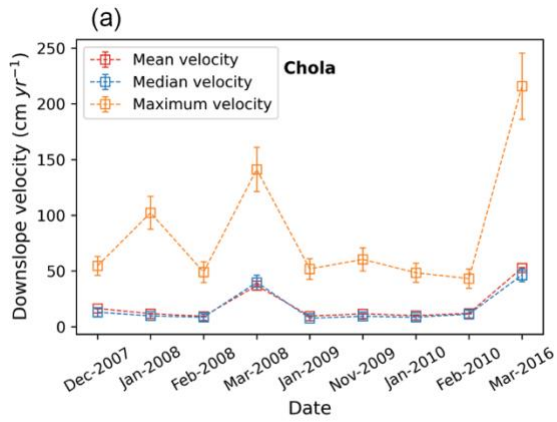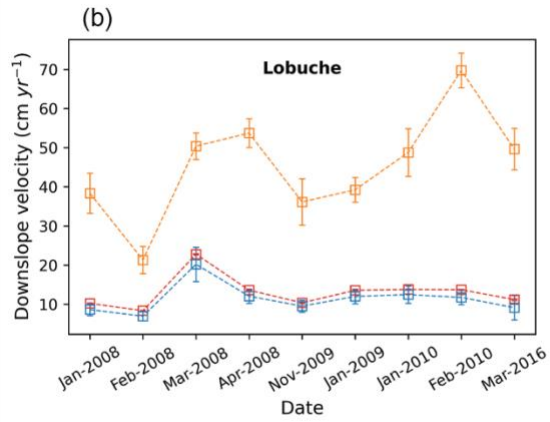

20 **Figure S2: Time series of the InSAR-derived downslope velocities of the two debris-covered-glaciers. The spatial mean velocities and uncertainties during each period are shown (black squares and error bars) as well as the median (blue) and maximum (red) velocities.**
